# Supplementary material
Source: PubMed Central journal article supplement (PMC8938896)
Supplement: jamainternmed-e220330-s001.pdf [file jamainternmed-e220330-s001.pdf]

## Supplementary Online Content

Ferrara A, Hedderson MM, Zhu Y, et al. Perinatal complications in individuals in California with or without SARS-CoV-2 infection during pregnancy. *JAMA Intern Med*. Published online March 21, 2022. doi:10.1001/jamainternmed.2022.0330

**eMethods.** Statistical Analysis

**eResults 1.** Comparing Individuals Who Tested Negative With Individuals Who Were Not Tested

**eResults 2.** Need for Respiratory Support Among Hospitalizations in Individuals With and Without SARS-CoV-2

**eTable 1.** ICD-10 Diagnostic Codes

**eTable 2.** Crude and Adjusted Hazard Ratio or Relative Risk of Perinatal Complications Stratified by Intervals of Gestational Age in Association With SARS-Cov-2 Test Status During Pregnancy Among Individuals Who Delivered Between March 2020 and March 2021

**eTable 3.** Frequency of Outcomes by Prepregnancy BMI Missing Status

**eTable 4.** Characteristics of Individuals Who Delivered Between March 2020 and March 2021 by Testing Status for SARS-Cov-2 During Pregnancy

**eTable 5.** Distribution of Conditions Included in the Severe Maternal Morbidity by SARS-Cov-2 During Pregnancy

**eTable 6.** List Of Severe Maternal Morbidity Diagnoses Among Those With SARS-Cov-2 and 2 or More Severe Maternal Morbidity Diagnoses on the Same Day

**eTable 7.** Crude and Adjusted Hazard Ratio or Relative Risk Of Perinatal Complications in Association With SARS-Cov-2 Occurring at Less Than 21 Weeks' Gestation or at 21 Weeks' or More Gestation Among Individuals Who Delivered Between March 2020 and March 2021

**eTable 8.** Crude and Adjusted Hazard Ratio or Relative Risk of Perinatal Complications in Association With SARS-Cov-2 Detected in Inpatient or Outpatient Settings During Pregnancy Among Individuals Who Delivered Between March 2020 and March 2021

**eTable 9.** Adjusted Hazard Ratios for Perinatal Complications Severe Maternal Morbidity In Association With SARS-CoV-2 Among Individuals With and Without Comorbidities

**eReferences.**

This supplementary material has been provided by the authors to give readers additional information about their work.

## **eMethods.** Statistical Analysis

We used multiple imputation<sup>1,2</sup> for variables with missing data such as NDI, parity, pre-gestational BMI, smoking (Table 1), as well as 7-minute Apgar score (0.3% missing), and NICU admission (0.3%). An underlying assumption in the application of multiple imputation techniques is that data are missing at random (MAR), meaning that given all observed variables, the probability of a variable being missing is independent from the unobserved data. This assumption cannot be tested with the observed data, and generally must be assessed based on clinical knowledge.<sup>3,4</sup> We note, however, that the frequency of missingness on all variables is extremely low ( $\leq 0.5\%$ ), with the exception of pre-pregnancy BMI, and therefore any departure from the MAR assumption for these rarely missing variables should result in little or no bias in estimation. Although the frequency of missing data for pre-pregnancy BMI was not low (8.8%), the observed distribution of pre-pregnancy BMI categories among individuals with no missing data was consistent with expectation, suggesting missingness being unrelated to unobserved BMI (MAR). In addition, BMI missingness was unrelated to SARS-CoV-2 status (Table 1) and to all perinatal complications of interest (eTable 3).

### **eResults 1.** Comparing Individuals Who Tested Negative With Individuals Who Were Not Tested

When we compared the 1,332 individuals with a positive test to the 14,763 with a negative test we observed similar differences in clinical characteristics (eTable 4). We combined these two groups given the similarity in distributions of clinical characteristics. In addition, the 14,763 with a negative test and the 27,791 who were not tested were very similar in regard to clinical characteristics (eTable 4). These justify our grouping of those who tested negative with those who were not tested give the similar distributions of the clinical characteristics.

### **eResults 2.** Need for Respiratory Support Among Hospitalizations in Individuals With and Without SARS-CoV-2

Among the 307 hospitalizations anchored to a positive SARS-CoV-2 test that occurred in individuals with SARS-CoV-2, 225 hospitalizations occurred around the time of delivery and 82 did not; whereas among the 24,489 hospitalizations observed among individuals without SARS-CoV-2 infection, 21,132 occurred around the time of delivery and 3,357 that did not. Overall, the need of respiratory support was higher among 307 hospitalizations anchored to a positive SARS-CoV-2 test than among the 24,489 hospitalizations observed among individuals without SARS-CoV2 infection (n=76 [24.8%] vs. n=2,551 [10.4%]; p value <0.0001). The need for respiratory support among hospitalizations that did not occur around the time of delivery was also higher in hospitalizations that were anchored to a SARS-CoV-2 positive test than in hospitalizations of individuals without SARS-CoV2 infection (n=50 [61.0%] vs. n=255 [7.6%]; p value <0.0001). Whereas the need of respiratory support among hospitalizations that occurred around the time of delivery was similar in hospitalizations that were anchored to a SARS-CoV-2 positive test and in hospitalizations of individuals without SARS-CoV2 infection (n=26 [11.6%] vs. n=2,296 [10.9%]; p value = 0.74).”

| <b>eTable 1. ICD-10 Diagnostic Codes</b> |                                                                                                                                                                                                                                                                                                                                                                                                                                                                                                                                                                                                                                                                                                                                                                                                                                                                                                                                                                                                                                                                                                                                                                                                                                                                                                                                                                                                                                                                                                                                                                                                                                                                                                                                                                                                                                                                                                                                                                                                                                                                                                                                                                                                                                                                                                                                                                                                                                                                                                                                                                                                                                                                                                                                                                                                                                                                                                                                                                                                                                                                                |
|------------------------------------------|--------------------------------------------------------------------------------------------------------------------------------------------------------------------------------------------------------------------------------------------------------------------------------------------------------------------------------------------------------------------------------------------------------------------------------------------------------------------------------------------------------------------------------------------------------------------------------------------------------------------------------------------------------------------------------------------------------------------------------------------------------------------------------------------------------------------------------------------------------------------------------------------------------------------------------------------------------------------------------------------------------------------------------------------------------------------------------------------------------------------------------------------------------------------------------------------------------------------------------------------------------------------------------------------------------------------------------------------------------------------------------------------------------------------------------------------------------------------------------------------------------------------------------------------------------------------------------------------------------------------------------------------------------------------------------------------------------------------------------------------------------------------------------------------------------------------------------------------------------------------------------------------------------------------------------------------------------------------------------------------------------------------------------------------------------------------------------------------------------------------------------------------------------------------------------------------------------------------------------------------------------------------------------------------------------------------------------------------------------------------------------------------------------------------------------------------------------------------------------------------------------------------------------------------------------------------------------------------------------------------------------------------------------------------------------------------------------------------------------------------------------------------------------------------------------------------------------------------------------------------------------------------------------------------------------------------------------------------------------------------------------------------------------------------------------------------------------|
| <b>Conditions</b>                        | <b>ICD-10 diagnostic codes</b>                                                                                                                                                                                                                                                                                                                                                                                                                                                                                                                                                                                                                                                                                                                                                                                                                                                                                                                                                                                                                                                                                                                                                                                                                                                                                                                                                                                                                                                                                                                                                                                                                                                                                                                                                                                                                                                                                                                                                                                                                                                                                                                                                                                                                                                                                                                                                                                                                                                                                                                                                                                                                                                                                                                                                                                                                                                                                                                                                                                                                                                 |
| COVID-19                                 | U07.1                                                                                                                                                                                                                                                                                                                                                                                                                                                                                                                                                                                                                                                                                                                                                                                                                                                                                                                                                                                                                                                                                                                                                                                                                                                                                                                                                                                                                                                                                                                                                                                                                                                                                                                                                                                                                                                                                                                                                                                                                                                                                                                                                                                                                                                                                                                                                                                                                                                                                                                                                                                                                                                                                                                                                                                                                                                                                                                                                                                                                                                                          |
| Chronic hypertension                     | I10x, I11x, I12x, I13x, I15x, O10x                                                                                                                                                                                                                                                                                                                                                                                                                                                                                                                                                                                                                                                                                                                                                                                                                                                                                                                                                                                                                                                                                                                                                                                                                                                                                                                                                                                                                                                                                                                                                                                                                                                                                                                                                                                                                                                                                                                                                                                                                                                                                                                                                                                                                                                                                                                                                                                                                                                                                                                                                                                                                                                                                                                                                                                                                                                                                                                                                                                                                                             |
| Pre-gestational asthma                   | J45.2x, J44x, J45x, J82x, J96.00x, J96.90x, J96.10x, J96.11x, J96.12x, J96.20x, J96.21x, J96.22x, J80x, R06.03x, J98.01x, R06.2x, J67.8x, B44.81x                                                                                                                                                                                                                                                                                                                                                                                                                                                                                                                                                                                                                                                                                                                                                                                                                                                                                                                                                                                                                                                                                                                                                                                                                                                                                                                                                                                                                                                                                                                                                                                                                                                                                                                                                                                                                                                                                                                                                                                                                                                                                                                                                                                                                                                                                                                                                                                                                                                                                                                                                                                                                                                                                                                                                                                                                                                                                                                              |
| Pre-gestational asthma                   | L22x, L20.0x, L20.81x, L20.82x, L20.84x, L20.89x, L20.9x, L24.0x, L24.1x, L25.3x, L24.5x, L23.5x, L23.1x, L25.5x, L23.7x, L24.7x, L57.8x, L55.0x, L55.9x, L56.0x, L56.1x, L56.2x, L56.3x, L55.1x, L56.8x, L56.9x, L25.0x, L24.3x, L23.2x, L23.0x, L24.81x, L25.2x, L25.8x, L23.4x, L23.89x, L24.89x, L25.9x, L23.9x, L24.9x, L30.0x, L30.2x, L30.8x, L30.9x, L25.4x, L23.6x, L24.6x, H01.11x, H10x, H16.26x, L25.1x, L23.3x, L24.4x, T80.52XAx, Z88x, T50.905Ax, T78.41XAx, T41.0X5Ax, T41.1X5Ax, T41.205Ax, T41.295Ax, T41.3X5Ax, T41.45XAx, T88.59XAx, T38.3X5Ax, T88.52XAx, T50.995Ax, T36.0X5Ax, T36.1X5Ax, T36.2X5Ax, T36.3X5Ax, T36.4X5Ax, T36.5X5Ax, T36.6X5Ax, T36.7X5Ax, T36.8X5Ax, T36.9X5Ax, T37.0X5Ax, T37.1X5Ax, T37.2X5Ax, T37.3X5Ax, T37.4X5Ax, T37.5X5Ax, T37.8X5Ax, T37.95XAx, T38.0X5Ax, T38.1X5Ax, T38.2X5Ax, T38.4X5Ax, T38.5X5Ax, T38.6X5Ax, T38.7X5Ax, T38.805Ax, T38.815Ax, T38.895Ax, T38.905Ax, T38.995Ax, T39.015Ax, T39.095Ax, T39.1X5Ax, T39.2X5Ax, T39.315Ax, T39.395Ax, T39.4X5Ax, T39.8X5Ax, T39.95XAx, T40.0X5Ax, T40.2X5Ax, T40.3X5Ax, T40.5X5Ax, T40.605Ax, T40.695Ax, T40.7X5Ax, T40.905Ax, T40.995Ax, T41.5X5Ax, T42.0X5Ax, T42.1X5Ax, T42.2X5Ax, T42.3X5Ax, T42.4X5Ax, T42.5X5Ax, T42.6X5Ax, T42.75XAx, T42.8X5Ax, T43.015Ax, T43.025Ax, T43.1X5Ax, T43.205Ax, T43.215Ax, T43.225Ax, T43.295Ax, T43.3X5Ax, T43.4X5Ax, T43.505Ax, T43.595Ax, T43.605Ax, T43.615Ax, T43.625Ax, T43.635Ax, T43.695Ax, T43.8X5Ax, T43.95XAx, T44.0X5Ax, T44.1X5Ax, T44.2X5Ax, T44.3X5Ax, T44.4X5Ax, T44.5X5Ax, T44.6X5Ax, T44.7X5Ax, T44.8X5Ax, T44.905Ax, T44.995Ax, T45.0X5Ax, T45.1X5Ax, T45.2X5Ax, T45.3X5Ax, T45.4X5Ax, T45.515Ax, T45.525Ax, T45.605Ax, T45.615Ax, T45.625Ax, T45.695Ax, T45.7X5Ax, T45.8X5Ax, T45.95XAx, T46.0X5Ax, T46.1X5Ax, T46.2X5Ax, T46.3X5Ax, T46.4X5Ax, T46.5X5Ax, T46.6X5Ax, T46.7X5Ax, T46.8X5Ax, T46.905Ax, T46.995Ax, T47.0X5Ax, T47.1X5Ax, T47.2X5Ax, T47.3X5Ax, T47.4X5Ax, T47.5X5Ax, T47.6X5Ax, T47.7X5Ax, T47.8X5Ax, T47.95XAx, T48.0X5Ax, T48.1X5Ax, T48.205Ax, T48.295Ax, T48.3X5Ax, T48.4X5Ax, T48.5X5Ax, T48.6X5Ax, T48.905Ax, T48.995Ax, T49.0X5Ax, T49.1X5Ax, T49.2X5Ax, T49.3X5Ax, T49.4X5Ax, T49.5X5Ax, T49.6X5Ax, T49.7X5Ax, T49.8X5Ax, T49.95XAx, T50.0X5Ax, T50.1X5Ax, T50.2X5Ax, T50.3X5Ax, T50.4X5Ax, T50.5X5Ax, T50.6X5Ax, T50.7X5Ax, T50.8X5Ax, T50.A15Ax, T50.A25Ax, T50.A95Ax, T50.B15Ax, T50.B95Ax, T50.Z15Ax, T50.Z95Ax, Z28.04x, T88.2XXAx, T78.2XXAx, T88.6XXAx, J30x, Z91.01x, L27.2x, T78.00XAx, T78.01XAx, T78.02XAx, T78.03XAx, T78.04XAx, T78.05XAx, T78.06XAx, T78.07XAx, T78.08XAx, T78.09XAx, Z91.02x, T65.811Ax, T65.812Ax, T65.813Ax, T65.814Ax, Z91.040x, D69.0x, Z91.038x, Z91.041x, Z91.048x, Z91.09x, J67x, J82x, B44.81x, K20.8x, K52.2x, M13.8x, T78.40XAx, T78.49XAx, H60.5x, H65.11x, H65.4x, H65.9x, L50.0x, L50.1x, L50.9x, T78.2XXAx, T80.51XAx, T80.59XAx, T78.3XXAx, D80x, D81.4x, D81.0x, D81.1x, D81.2x, D81.6x, D81.7x, D81.89x, D81.9x, D82x, D83x, D84x, D89.8x, D89.3x, D89.9x, M35.9x, G04.8x, L51x, L12.3x, M71.50x, M71.1x, T80.29XAx, T88.0XXAx, N98.0x, R50.83x |
| Pre-gestational autoimmune diseases      | L63x, L65x, L64x, L66.0x, L66.2x, L66.8x, L66.9x, L81x, L57.3x, L95.9x, L95.0x, L95.8x, L90.5x, L92.1x, L94.2x, L98.8x, L92.3x, L94.2x, L94.4x, L44.8x, L44.9x, L45x, L98.8x, L99x, E08.628, E09.628, L98.9x, L80x, L10x, L12.0x, L12.8x, L12.9x, L13.9x, E10x, E27.1x, E27.2x, E27.3x, E27.4x, E89.6x, E31.0x, E05.0x, E06.3x, E05.2x, E05.3x, E05.4x, E05.8x, E05.9x, K50x, K51x, K52x, D69.41x, K71x, K75.2x, K75.3x, K75.8x, K75.9x, K76.4x, K75.4, K73.1, K73.2, K73.8, K90.1x, K90.2x, K91.2x, K90.3x, K90.4x, K90.89x, K90.9x, K74.3x, K74.4x, K74.5x, D59.0x, D59.1x, Z86.2x, D68.311,                                                                                                                                                                                                                                                                                                                                                                                                                                                                                                                                                                                                                                                                                                                                                                                                                                                                                                                                                                                                                                                                                                                                                                                                                                                                                                                                                                                                                                                                                                                                                                                                                                                                                                                                                                                                                                                                                                                                                                                                                                                                                                                                                                                                                                                                                                                                                                                                                                                                                 |

|                                  |                                                                                                                                                                                                                                                                                                                                                                                                                                                                                                                                                                                                                                                                                                                                                                                                                                                                                                                                                                                                                                                                                                                                                                                                                                                                                                                                                                                                                                                                                                                                            |
|----------------------------------|--------------------------------------------------------------------------------------------------------------------------------------------------------------------------------------------------------------------------------------------------------------------------------------------------------------------------------------------------------------------------------------------------------------------------------------------------------------------------------------------------------------------------------------------------------------------------------------------------------------------------------------------------------------------------------------------------------------------------------------------------------------------------------------------------------------------------------------------------------------------------------------------------------------------------------------------------------------------------------------------------------------------------------------------------------------------------------------------------------------------------------------------------------------------------------------------------------------------------------------------------------------------------------------------------------------------------------------------------------------------------------------------------------------------------------------------------------------------------------------------------------------------------------------------|
|                                  | D69.3x, D69.51x, D69.59x, D69.6x, D89.1x, G73.3x, G61.81x, G04.02x, G04.32x, G04.02x, M30.3x, P94.0x, G35x, G70.0x, G61.0x, H44.11x, H35.06x, H30.9x, H30.2x, H30.8x, H20.9x, H05.12x, H44.13x, H81.0x, D89.82x, D89.89x, D80x, D83x, D82x, D81.4x, D81.0x, D81.1x, D81.2x, D81.6x, D81.7x, D81.89x, D81.9x, D84x, D89.81x, D89.3x, D89.89x, M35.9x, D89.9x, N05.0x, N05.1x, N05.6x, N05.7x, N05.8x, N06.0x, N06.1x, N06.6x, N06.7x, N06.8x, N07.0x, N07.1x, N07.6x, N07.7x, N07.8x, N14x, N15.0x, N15.8x, N05.9x, N06.9x, N07.9x, N15.9x, M06.9x, M05.4x, M05.5x, M05.7x, M05.8x, M05.9x, M06.0x, M06.2x, M06.3x, M06.8x, M05.2x, M05.3x, M05.6x, M06.1x, M08.0x, M08.2x, M08.3x, M08.4x, M08.8x, M08.9x, I00x, I01x, I02x, I05x, I06x, I08x, I07x, I09x, L90.0x, L94.0x, L94.1x, L94.3x, M35.5x, M35.1x, M35.8x, M35.9x, M36.8x, M31.0x, M31.0x, M33.9x, M33.0x, M33.1x, M36.0x, M33.2x, M31.0x, H01.12x, L93x, M32x, M34x, M45x, M08.1x, M48.8x, M46.9x, D72.41x, M34.81x, M61.1x, M60.1x, M35.0x, M84.8x, M84.9x, M85.1x, M85.8x, M89.2x, M89.3x, M89.5x, M89.8x, M94.1x, M94.35x, M94.8x, M35.3x, L40x, L41x, L42x, L30.5x, L44.0x, L44.8x, L45x, L49.5x, M02.3x, M02.3x, M01x, D86x, G02x, J99x, M32.13x, M33.01x, M33.11x, M33.21x, M33.91x, M35.02x, M30.0x, M30.2x, M30.8x, M31.7x, M30.1x, M31.3x, M31.6x, M31.5x, M31.4x, I77.6x, I77.3x, I77.89x, I73.0x, M35.2x, M35.2x, K90.0x, J84.11x, J84.2x, L43x, L44.1x, L44.x, L44.3x, L44.9x, L66.1x, H46.9x, H46.0x, H46.8x, L51.1x, L51.3x, M31.1x, K83.0x, K80.3x, M05.0x, M06.4x |
| Gestational hypertension         | O13x, O16x                                                                                                                                                                                                                                                                                                                                                                                                                                                                                                                                                                                                                                                                                                                                                                                                                                                                                                                                                                                                                                                                                                                                                                                                                                                                                                                                                                                                                                                                                                                                 |
| Pre-eclampsia/<br>Eclampsia      | O14x, O15x                                                                                                                                                                                                                                                                                                                                                                                                                                                                                                                                                                                                                                                                                                                                                                                                                                                                                                                                                                                                                                                                                                                                                                                                                                                                                                                                                                                                                                                                                                                                 |
| Proteinuria                      | O12.1x, O12.2x                                                                                                                                                                                                                                                                                                                                                                                                                                                                                                                                                                                                                                                                                                                                                                                                                                                                                                                                                                                                                                                                                                                                                                                                                                                                                                                                                                                                                                                                                                                             |
| Thrombocytopenia                 | D69.4x, D69.5x, D69.6x                                                                                                                                                                                                                                                                                                                                                                                                                                                                                                                                                                                                                                                                                                                                                                                                                                                                                                                                                                                                                                                                                                                                                                                                                                                                                                                                                                                                                                                                                                                     |
| Pulmonary edema                  | J81x                                                                                                                                                                                                                                                                                                                                                                                                                                                                                                                                                                                                                                                                                                                                                                                                                                                                                                                                                                                                                                                                                                                                                                                                                                                                                                                                                                                                                                                                                                                                       |
| Venous<br>Thromboembolism        | I26.0x, I26.9x, I80.1x, I80.2x, I80.3x, I80.8x, I80.9x, I82.0x, I82.1x, I82.2x, I82.3x, I82.4x, I82.6x, I82.8x, I82.9x, O08.2x, O22.3x, O22.5x, O87.1x, O88.2x, I81x, I82.A1x, I82.B1x, I82.C1x                                                                                                                                                                                                                                                                                                                                                                                                                                                                                                                                                                                                                                                                                                                                                                                                                                                                                                                                                                                                                                                                                                                                                                                                                                                                                                                                            |
| Stillbirth                       | O36.4XX0, O36.4XX1, O36.4XX2, O36.4XX3, O36.4XX4, O36.4XX5, O36.4XX9, P95, Z37.1, Z37.4, Z37.7                                                                                                                                                                                                                                                                                                                                                                                                                                                                                                                                                                                                                                                                                                                                                                                                                                                                                                                                                                                                                                                                                                                                                                                                                                                                                                                                                                                                                                             |
| Cesarean delivery                | O82, O90.0, O75.82, P03.4                                                                                                                                                                                                                                                                                                                                                                                                                                                                                                                                                                                                                                                                                                                                                                                                                                                                                                                                                                                                                                                                                                                                                                                                                                                                                                                                                                                                                                                                                                                  |
| Cesarean delivery<br>(PX)        | 10D00Z0, 10D00Z1, 10D00Z2                                                                                                                                                                                                                                                                                                                                                                                                                                                                                                                                                                                                                                                                                                                                                                                                                                                                                                                                                                                                                                                                                                                                                                                                                                                                                                                                                                                                                                                                                                                  |
| Transient tachypnea              | P22.1                                                                                                                                                                                                                                                                                                                                                                                                                                                                                                                                                                                                                                                                                                                                                                                                                                                                                                                                                                                                                                                                                                                                                                                                                                                                                                                                                                                                                                                                                                                                      |
| Pre-gestational<br>diabetes      | From registry                                                                                                                                                                                                                                                                                                                                                                                                                                                                                                                                                                                                                                                                                                                                                                                                                                                                                                                                                                                                                                                                                                                                                                                                                                                                                                                                                                                                                                                                                                                              |
| Gestational diabetes             | From registry                                                                                                                                                                                                                                                                                                                                                                                                                                                                                                                                                                                                                                                                                                                                                                                                                                                                                                                                                                                                                                                                                                                                                                                                                                                                                                                                                                                                                                                                                                                              |
| Maternal assisted<br>ventilation | EHR inpatient flow sheet                                                                                                                                                                                                                                                                                                                                                                                                                                                                                                                                                                                                                                                                                                                                                                                                                                                                                                                                                                                                                                                                                                                                                                                                                                                                                                                                                                                                                                                                                                                   |
| Infant assisted<br>ventilation   | EHR inpatient flow sheet                                                                                                                                                                                                                                                                                                                                                                                                                                                                                                                                                                                                                                                                                                                                                                                                                                                                                                                                                                                                                                                                                                                                                                                                                                                                                                                                                                                                                                                                                                                   |
| Surfactant<br>administration     | Manual review                                                                                                                                                                                                                                                                                                                                                                                                                                                                                                                                                                                                                                                                                                                                                                                                                                                                                                                                                                                                                                                                                                                                                                                                                                                                                                                                                                                                                                                                                                                              |
| Spontaneous<br>delivery          | O60.1x                                                                                                                                                                                                                                                                                                                                                                                                                                                                                                                                                                                                                                                                                                                                                                                                                                                                                                                                                                                                                                                                                                                                                                                                                                                                                                                                                                                                                                                                                                                                     |
| PPROM                            | O42.x (excludes O42.00, O42.02, O42.10, O42.12, O42.90, O42.92)<br>P01.1                                                                                                                                                                                                                                                                                                                                                                                                                                                                                                                                                                                                                                                                                                                                                                                                                                                                                                                                                                                                                                                                                                                                                                                                                                                                                                                                                                                                                                                                   |
| Induced labor (PX)               | 3E033VJ, 3E0P7GC, 0U7C7ZZ, 0U7C7DZ                                                                                                                                                                                                                                                                                                                                                                                                                                                                                                                                                                                                                                                                                                                                                                                                                                                                                                                                                                                                                                                                                                                                                                                                                                                                                                                                                                                                                                                                                                         |
| SMM                              |                                                                                                                                                                                                                                                                                                                                                                                                                                                                                                                                                                                                                                                                                                                                                                                                                                                                                                                                                                                                                                                                                                                                                                                                                                                                                                                                                                                                                                                                                                                                            |
| Acute myocardial<br>infarction   | I21.xx, I22.x                                                                                                                                                                                                                                                                                                                                                                                                                                                                                                                                                                                                                                                                                                                                                                                                                                                                                                                                                                                                                                                                                                                                                                                                                                                                                                                                                                                                                                                                                                                              |
| Aneurysm                         | I71.xx, I79.0                                                                                                                                                                                                                                                                                                                                                                                                                                                                                                                                                                                                                                                                                                                                                                                                                                                                                                                                                                                                                                                                                                                                                                                                                                                                                                                                                                                                                                                                                                                              |
| Acute renal failure              | N17.x, O90.4                                                                                                                                                                                                                                                                                                                                                                                                                                                                                                                                                                                                                                                                                                                                                                                                                                                                                                                                                                                                                                                                                                                                                                                                                                                                                                                                                                                                                                                                                                                               |

|                                                  |                                                                                                                                                                                                                                                                                                                                                                                                                                                                                                                                                                                                                                                                                                                                                                                                                                                                                                                                                                                                                                                                                                                                                                                                |
|--------------------------------------------------|------------------------------------------------------------------------------------------------------------------------------------------------------------------------------------------------------------------------------------------------------------------------------------------------------------------------------------------------------------------------------------------------------------------------------------------------------------------------------------------------------------------------------------------------------------------------------------------------------------------------------------------------------------------------------------------------------------------------------------------------------------------------------------------------------------------------------------------------------------------------------------------------------------------------------------------------------------------------------------------------------------------------------------------------------------------------------------------------------------------------------------------------------------------------------------------------|
| Acute respiratory distress syndrome              | J80, J95.1, J95.2, J95.3, J95.82x, J96.0x, J96.2x R09.2                                                                                                                                                                                                                                                                                                                                                                                                                                                                                                                                                                                                                                                                                                                                                                                                                                                                                                                                                                                                                                                                                                                                        |
| Amniotic fluid embolism                          | O88.1x                                                                                                                                                                                                                                                                                                                                                                                                                                                                                                                                                                                                                                                                                                                                                                                                                                                                                                                                                                                                                                                                                                                                                                                         |
| Cardiac arrest/ventricular fibrillation          | I46.x, I49.0x                                                                                                                                                                                                                                                                                                                                                                                                                                                                                                                                                                                                                                                                                                                                                                                                                                                                                                                                                                                                                                                                                                                                                                                  |
| Conversion of cardiac rhythm (PX)                | 5A2204Z, 5A12012                                                                                                                                                                                                                                                                                                                                                                                                                                                                                                                                                                                                                                                                                                                                                                                                                                                                                                                                                                                                                                                                                                                                                                               |
| Disseminated intravascular coagulation           | D65, D68.8, D68.9, O72.3                                                                                                                                                                                                                                                                                                                                                                                                                                                                                                                                                                                                                                                                                                                                                                                                                                                                                                                                                                                                                                                                                                                                                                       |
| Eclampsia                                        | O15.x                                                                                                                                                                                                                                                                                                                                                                                                                                                                                                                                                                                                                                                                                                                                                                                                                                                                                                                                                                                                                                                                                                                                                                                          |
| Heart failure/arrest during surgery or procedure | I97.12x, I97.13x, I97.710, I97.711                                                                                                                                                                                                                                                                                                                                                                                                                                                                                                                                                                                                                                                                                                                                                                                                                                                                                                                                                                                                                                                                                                                                                             |
| Puerperal cerebrovascular disorders              | I60.xx- I68.xx, O22.51, O22.52, O22.53, I97.81x, I97.82x, O87.3                                                                                                                                                                                                                                                                                                                                                                                                                                                                                                                                                                                                                                                                                                                                                                                                                                                                                                                                                                                                                                                                                                                                |
| Pulmonary edema / Acute heart failure            | J81.0, I50.1, I50.20, I50.21, I50.23, I50.30, I50.31, I50.33, I50.40, I50.41, I50.43, I50.9                                                                                                                                                                                                                                                                                                                                                                                                                                                                                                                                                                                                                                                                                                                                                                                                                                                                                                                                                                                                                                                                                                    |
| Severe anesthesia complications                  | O74.0, O74.1, O74.2, O74.3, O89.0x, O89.1, O89.2                                                                                                                                                                                                                                                                                                                                                                                                                                                                                                                                                                                                                                                                                                                                                                                                                                                                                                                                                                                                                                                                                                                                               |
| Sepsis                                           | O85, O86.04, T80.211A, T81.4XXA, T81.44xx, R65.20, A40.x, A41.x, A32.7                                                                                                                                                                                                                                                                                                                                                                                                                                                                                                                                                                                                                                                                                                                                                                                                                                                                                                                                                                                                                                                                                                                         |
| Shock                                            | O75.1, R57.x, R65.21, T78.2XXA, T88.2 XXA, T88.6 XXA, T81.10XA, T81.11XA, T81.19XA                                                                                                                                                                                                                                                                                                                                                                                                                                                                                                                                                                                                                                                                                                                                                                                                                                                                                                                                                                                                                                                                                                             |
| Sickle cell disease with crisis                  | D57.0x, D57.21x, D57.41x, D57.81x                                                                                                                                                                                                                                                                                                                                                                                                                                                                                                                                                                                                                                                                                                                                                                                                                                                                                                                                                                                                                                                                                                                                                              |
| Air and thrombotic embolism                      | I26.x, O88.0x, O88.2x, O88.3x, O88.8x                                                                                                                                                                                                                                                                                                                                                                                                                                                                                                                                                                                                                                                                                                                                                                                                                                                                                                                                                                                                                                                                                                                                                          |
| Blood products transfusion (PX)                  | 30233H1, 30233L1, 30233K1, 30233M1, 30233N1, 30233P1, 30233R1, 30233T1, 30233H0, 30233L0, 30233K0, 30233M0, 30233N0, 30233P0, 30233R0, 30233T0, 30230H1, 30230L1, 30230K1, 30230M1, 30230N1, 30230P1, 30230R1, 30230T1, 30230H0, 30230L0, 30230K0, 30230M0, 30230N0, 30230P0, 30230R0, 30230T0, 30240H1, 30240L1, 30240K1, 30240M1, 30240N1, 30240P1, 30240R1, 30240T1, 30240H0, 30240L0, 30240K0, 30240M0, 30240N0, 30240P0, 30240R0, 30240T0, 30243H1, 30243L1, 30243K1, 30243M1, 30243N1, 30243P1, 30243R1, 30243T1, 30243H0, 30243L0, 30243K0, 30243M0, 30243N0, 30243P0, 30243R0, 30243T0, 30250H1, 30250L1, 30250K1, 30250M1, 30250N1, 30250P1, 30250R1, 30250T1, 30250H0, 30250L0, 30250K0, 30250M0, 30250N0, 30250P0, 30250R0, 30250T0, 30253H1, 30253L1, 30253K1, 30253M1, 30253N1, 30253P1, 30253R1, 30253T1, 30253H0, 30253L0, 30253K0, 30253M0, 30253N0, 30253P0, 30253R0, 30253T0, 30260H1, 30260L1, 30260K1, 30260M1, 30260N1, 30260P1, 30260R1, 30260T1, 30260H0, 30260L0, 30260K0, 30260M0, 30260N0, 30260P0, 30260R0, 30260T0, 30263H1, 30263L1, 30263K1, 30263M1, 30263N1, 30263P1, 30263R1, 30263T1, 30263H0, 30263L0, 30263K0, 30263M0, 30263N0, 30263P0, 30263R0, 30263T0 |
| Hysterectomy (PX)                                | 0UT90ZZ, 0UT94ZZ, 0UT97ZZ, 0UT98ZZ, 0UT9FZZ                                                                                                                                                                                                                                                                                                                                                                                                                                                                                                                                                                                                                                                                                                                                                                                                                                                                                                                                                                                                                                                                                                                                                    |
| Temporary tracheostomy (PX)                      | 0B110Z, 0B110F, 0B113, 0B114                                                                                                                                                                                                                                                                                                                                                                                                                                                                                                                                                                                                                                                                                                                                                                                                                                                                                                                                                                                                                                                                                                                                                                   |
| Ventilation (PX)                                 | 5A1935Z, 5A1945Z, 5A1955Z                                                                                                                                                                                                                                                                                                                                                                                                                                                                                                                                                                                                                                                                                                                                                                                                                                                                                                                                                                                                                                                                                                                                                                      |

**eTable 2.** Crude and Adjusted Hazard Ratio or Relative Risk of Perinatal Complications Stratified by Intervals of Gestational Age in Association With SARS-CoV-2 Test Status During Pregnancy Among Individuals Who Delivered Between March 2020 and March 2021

|                                  | With SARS-CoV-2<br>N= 1332 | Without SARS-CoV-2<br>N= 42554 |  |                       |                      |                      |
|----------------------------------|----------------------------|--------------------------------|--|-----------------------|----------------------|----------------------|
|                                  | n (%)                      | n (%)                          |  | Hazard ratio (95% CI) |                      |                      |
|                                  |                            |                                |  | Crude                 | Model 1 <sup>a</sup> | Model 2 <sup>b</sup> |
| <b>Severe Maternal Morbidity</b> |                            |                                |  |                       |                      |                      |
| Diagnosed < 28 weeks' gestation  | 13 (1.0)                   | 107 (0.3)                      |  | 20.5 (10.9, 38.8)     | 17.4 (9.05, 33.5)    | 16.7 (8.63, 32.3)    |
| Diagnosed ≥ 28 weeks' gestation  | 63 (4.7)                   | 1322 (3.1)                     |  | 2.19 (1.69, 2.84)     | 2.09 (1.61, 2.72)    | 2.14 (1.64, 2.79)    |
| <b>Gestational diabetes</b>      |                            |                                |  |                       |                      |                      |
| Diagnosed < 28 weeks' gestation  | 16 (1.2)                   | 2925 (6.9)                     |  | 0.76 (0.47, 1.26)     | 0.78 (0.47, 1.28)    | 0.77 (0.47, 1.27)    |
| Diagnosed ≥ 28 weeks' gestation  | 29 (2.2)                   | 1058 (2.5)                     |  | 1.46 (1.02, 2.09)     | 1.49 (1.04, 2.14)    | 1.42 (0.98, 2.06)    |
| <b>Venous thromboembolism</b>    |                            |                                |  |                       |                      |                      |
| Diagnosed < 21 weeks' gestation  | 2 (0.2)                    | 59 (0.1)                       |  | 24.5 (5.81, 104)      | 21.9 (5.02, 95.7)    | 20.5 (4.71, 89.6)    |
| Diagnosed ≥ 21 weeks' gestation  | 2 (0.2)                    | 71 (0.2)                       |  | 1.63 (0.40, 6.60)     | 1.70 (0.43, 6.75)    | 1.80 (0.44, 7.38)    |

Number of events reported among individuals who were SARS-CoV-2 positive are those that occurred after a SARS-CoV-2 positive test. In this group the numbers of events that occurred before a SARS-CoV-2 positive test were: 6 with early diagnosis and 1 with late diagnosis for severe maternal morbidities, 58 with early diagnosis and 25 with late diagnosis for gestational diabetes, and 5 with early diagnosis for venous thromboembolism.

<sup>a</sup> Model 1 adjusted for age, neighborhood deprivation index, pre-pregnancy BMI

<sup>b</sup> Model 2 adjusted for variable in Model 1 + race/ethnicity, pre-gestational diabetes, chronic hypertension and smoking during pregnancy

Given the small number of individuals who were American Indian/Alaskan Native, multiracial or had missing race/ethnicity data, we collapsed them in one group in the regression models.

Severe Maternal Morbidity includes at least one of the following morbidities occurring at any time during pregnancy: acute myocardial infarction, aneurysm, acute renal failure, adult respiratory distress syndrome, amniotic fluid embolism, cardiac arrest/ventricular fibrillation, conversion of cardiac rhythm, disseminated intravascular coagulation, eclampsia, heart failure/arrest during surgery or procedure, puerperal cerebrovascular disorders, pulmonary edema/acute heart failure, severe anesthesia complications, sepsis, shock, sickle cell disease with crisis, air and thrombotic embolism, blood products transfusion, hysterectomy, temporary tracheostomy, or ventilation.<sup>5</sup>

**eTable 3. Frequency of Outcomes by Prepregnancy BMI Missing Status**

| Outcomes                                                | Pre-pregnancy BMI |              |
|---------------------------------------------------------|-------------------|--------------|
|                                                         | Missing           |              |
|                                                         | Yes               | No           |
|                                                         | N (%)             | N (%)        |
| Severe Maternal Morbidity                               | 134 (3.5)         | 1371 (3.4)   |
| Preterm birth, <37 weeks' gestation                     | 343 (8.8)         | 3238 (8.1)   |
| Spontaneous preterm birth, <37 weeks' gestation         | 173 (4.5)         | 1522 (3.8)   |
| Medically indicated preterm birth, <37 weeks' gestation | 170 (4.4)         | 1716 (4.3)   |
| Early preterm birth, 22-31 weeks' gestation             | 68 (1.8)          | 457 (1.1)    |
| Moderate preterm birth, 32-33 weeks' gestation          | 33 (0.9)          | 332 (0.8)    |
| Late preterm birth, 34-36 weeks' gestation              | 233 (6.0)         | 2349 (5.9)   |
| Gestational hypertension                                | 222 (5.7)         | 1268 (3.2)   |
| Pre-eclampsia/ Eclampsia                                | 54 (1.4)          | 627 (1.6)    |
| Gestational diabetes                                    | 254 (6.6)         | 3774 (9.4)   |
| Venous thromboembolism                                  | 6 (0.2)           | 128 (0.3)    |
|                                                         |                   |              |
| Stillbirth                                              | 43 (1.1)          | 238 (0.6)    |
| Cesarean delivery                                       | 1009 (26.0)       | 10762 (26.9) |
| Newborn's Transient tachypnea                           | 141 (3.7)         | 1247 (3.1)   |
| Newborn's Respiratory Support                           |                   |              |
| Non-Invasive                                            | 219 (5.7)         | 2037 (5.1)   |
| Invasive                                                | 4 (0.1)           | 48 (0.1)     |
| Any of the above respiratory support                    | 219 (5.7)         | 2048 (5.1)   |
| Newborn's Surfactant Administration                     | 23 (0.6)          | 235 (0.6)    |
| Apgar Score < 7                                         | 49 (1.3)          | 463 (1.2)    |
| Small for gestational age                               | 334 (8.7)         | 2945 (7.4)   |
| Large for gestational age                               | 237 (6.2)         | 2871 (7.2)   |
| Neonatal intensive care unit admission                  | 378 (9.9)         | 3477 (8.7)   |

**eTable 4.** Characteristics of Individuals Who Delivered Between March 2020 and March 2021 by Testing Status for SARS-CoV-2 During Pregnancy

|                                             | Total<br>N= 43886 | SARS-CoV-2 positive<br>test<br>N= 1332 | SARS-CoV-2 negative<br>test<br>N= 14763 | Not<br>Tested<br>N= 27791 |  | SMD<br>Positive vs.<br>Negative<br>SARS-CoV-2 test | SMD<br>Not tested<br>vs. Negative<br>SARS-CoV-2 |
|---------------------------------------------|-------------------|----------------------------------------|-----------------------------------------|---------------------------|--|----------------------------------------------------|-------------------------------------------------|
| Age, mean (SD), years                       | 30.7 (5.2)        | 28.8 (5.5)                             | 30.9 (5.2)                              | 30.7 (5.2)                |  | -0.395                                             | -0.051                                          |
| Age, n (%), years                           |                   |                                        |                                         |                           |  |                                                    |                                                 |
| <25                                         | 5546<br>(12.6)    | 313 (23.5)                             | 1714 (11.6)                             | 3519 (12.7)               |  | 0.316                                              | 0.032                                           |
| 25-29                                       | 11590<br>(26.4)   | 426 (32.0)                             | 3735 (25.3)                             | 7429 (26.7)               |  | 0.148                                              | 0.033                                           |
| 30-34                                       | 16298<br>(37.1)   | 361 (27.1)                             | 5588 (37.9)                             | 10349<br>(37.2)           |  | -0.231                                             | -0.014                                          |
| 35-54                                       | 10452<br>(23.8)   | 232 (17.4)                             | 3726 (25.2)                             | 6494 (23.4)               |  | -0.192                                             | -0.044                                          |
| Race/ethnicity, n (%)                       |                   |                                        |                                         |                           |  |                                                    |                                                 |
| American Indian/<br>Alaska Native           | 151 (0.3)         | 2 (0.2)                                | 54 (0.4)                                | 95 (0.3)                  |  | -0.0425                                            | -0.004                                          |
| Asian/Pacific Islander                      | 11368<br>(25.9)   | 201 (15.1)                             | 3926 (26.6)                             | 7241 (26.1)               |  | -0.2861                                            | -0.0122                                         |
| Black                                       | 2874 (6.5)        | 91 (6.8)                               | 963 (6.5)                               | 1820 (6.5)                |  | 0.0124                                             | 0.001                                           |
| Hispanic                                    | 12457<br>(28.4)   | 698 (52.4)                             | 4149 (28.1)                             | 7610 (27.4)               |  | 0.5114                                             | -0.0161                                         |
| White                                       | 14829<br>(33.8)   | 304 (22.8)                             | 4895 (33.2)                             | 9630 (34.7)               |  | -0.2317                                            | 0.0316                                          |
| Other/Unknown                               | 2207 (5.0)        | 36 (2.7)                               | 776 (5.3)                               | 1395 (5.0)                |  | -0.1309                                            | -0.0107                                         |
| Neighborhood<br>Deprivation Index, n<br>(%) |                   |                                        |                                         |                           |  |                                                    |                                                 |
| First quartile                              | 10898<br>(24.8)   | 139 (10.4)                             | 3667 (24.8)                             | 7092 (25.5)               |  | -0.385                                             | 0.016                                           |
| Second quartile                             | 10926<br>(24.9)   | 254 (19.1)                             | 3666 (24.8)                             | 7006 (25.2)               |  | -0.140                                             | 0.009                                           |
| Third quartile                              | 11008<br>(25.1)   | 397 (29.8)                             | 3729 (25.3)                             | 6882 (24.8)               |  | 0.120                                              | -0.011                                          |
| Fourth quartile                             | 10834<br>(24.7)   | 535 (40.2)                             | 3547 (24.0)                             | 6752 (24.3)               |  | 0.351                                              | 0.006                                           |
| Missing                                     | 220 (0.5)         | 7 (0.5)                                | 154 (1.0)                               | 59 (0.2)                  |  | -0.059                                             | -0.105                                          |
| Parity, n (%)                               |                   |                                        |                                         |                           |  |                                                    |                                                 |
| 0                                           | 19561<br>(44.6)   | 508 (38.1)                             | 6582 (44.6)                             | 12471<br>(44.9)           |  | -0.131                                             | 0.006                                           |
| 1                                           | 15206<br>(34.6)   | 450 (33.8)                             | 5176 (35.1)                             | 9580 (34.5)               |  | -0.027                                             | -0.012                                          |
| 2+                                          | 8993<br>(20.5)    | 371 (27.9)                             | 2956 (20.0)                             | 5666 (20.4)               |  | 0.184                                              | 0.009                                           |
| Missing                                     | 126 (0.3)         | 3 (0.2)                                | 49 (0.3)                                | 74 (0.3)                  |  | -0.020                                             | -0.012                                          |
| Pre-gestational<br>diabetes, n (%)          | 594 (1.4)         | 19 (1.4)                               | 217 (1.5)                               | 358 (1.3)                 |  | -0.004                                             | -0.016                                          |



|                                                      |              |             |              |              |  |        |         |
|------------------------------------------------------|--------------|-------------|--------------|--------------|--|--------|---------|
| <b>Chronic hypertension, n (%)</b>                   | 8598 (19.6)  | 301 (22.6)  | 2986 (20.2)  | 5311 (19.1)  |  | 0.058  | -0.028  |
| <b>Asthma, n (%)</b>                                 | 5107 (11.6)  | 160 (12.0)  | 1861 (12.6)  | 3086 (11.1)  |  | -0.018 | -0.047  |
| <b>Allergies, n (%)</b>                              | 10302 (23.5) | 318 (23.9)  | 3624 (24.5)  | 6360 (22.9)  |  | -0.016 | -0.039  |
| <b>Autoimmune diseases, n (%)</b>                    | 6639 (15.1)  | 203 (15.2)  | 2308 (15.6)  | 4128 (14.9)  |  | -0.011 | -0.022  |
| <b>Pre-pregnancy body mass index, n (%)</b>          |              |             |              |              |  |        |         |
| Underweight                                          | 775 (1.8)    | 17 (1.3)    | 246 (1.7)    | 512 (1.8)    |  | -0.032 | 0.0134  |
| Normal weight                                        | 14632 (33.3) | 331 (24.8)  | 4873 (33.0)  | 9428 (33.9)  |  | -0.181 | 0.0194  |
| Overweight                                           | 12421 (28.3) | 376 (28.2)  | 4290 (29.1)  | 7755 (27.9)  |  | -0.018 | -0.026  |
| Obese                                                | 12181 (27.8) | 504 (37.8)  | 4251 (28.8)  | 7426 (26.7)  |  | 0.193  | -0.046  |
| Missing                                              | 3877 (8.8)   | 104 (7.8)   | 1103 (7.5)   | 2670 (9.6)   |  | 0.013  | 0.077   |
| <b>Singleton, n (%)</b>                              | 43254 (98.6) | 1311 (98.4) | 14534 (98.4) | 27409 (98.6) |  | -0.002 | 0.015   |
| <b>Female infant sex, n (%)</b>                      | 21279 (48.8) | 635 (48.0)  | 7154 (48.5)  | 13490 (48.5) |  | -0.017 | -0.0003 |
| <b>Gestational age at delivery, mean (SD), weeks</b> | 38.6 (2.2)   | 38.4 (2.2)  | 38.5 (2.3)   | 38.7 (2.1)   |  | -0.044 | 0.108   |
| <b>Gestational age at delivery, n (%), weeks</b>     |              |             |              |              |  |        |         |
| <21                                                  | 109 (0.2)    | 5 (0.4)     | 41 (0.3)     | 63 (0.2)     |  | 0.017  | -0.010  |
| 22-31                                                | 525 (1.2)    | 15 (1.1)    | 252 (1.7)    | 258 (0.9)    |  | -0.049 | -0.068  |
| 32-33                                                | 365 (0.8)    | 14 (1.1)    | 132 (0.9)    | 219 (0.8)    |  | 0.016  | -0.012  |
| 34-36                                                | 2582 (5.9)   | 109 (8.2)   | 910 (6.2)    | 1563 (5.6)   |  | 0.078  | -0.023  |
| 37+                                                  | 40305 (91.8) | 1189 (89.3) | 13428 (91.0) | 25688 (92.4) |  | -0.057 | 0.054   |
| <b>Smoking during pregnancy, n (%)</b>               |              |             |              |              |  |        |         |
| Never                                                | 42130 (96.0) | 1272 (95.5) | 14161 (95.9) | 26697 (96.1) |  | 0.030  | -0.009  |
| Ever                                                 | 1678 (3.8)   | 60 (4.5)    | 577 (3.9)    | 1041 (3.7)   |  | -0.021 | 0.007   |
| Missing                                              | 78 (0.2)     | 0 (0)       | 25 (0.2)     | 53 (0.2)     |  | 0      | 0       |

SARS-CoV-2: severe acute respiratory syndrome coronavirus 2;

SMD: standardized mean difference;

Pre-gestational body mass index was categorized according to the World Health Organization recommendations on racial/ethnic specific BMI cutoffs: non-Asian individuals as underweight [ $<18.5$  kg/m<sup>2</sup>], normal weight [ $18.5$ - $24.9$  kg/m<sup>2</sup>], overweight [ $25.0$ - $29.9$  kg/m<sup>2</sup>], obese [ $30.0$  kg/m<sup>2</sup>]; and Asians as underweight [ $<18.5$  kg/m<sup>2</sup>], normal weight [ $18.5$ - $22.9$  kg/m<sup>2</sup>], overweight [ $23.0$ - $27.4$  kg/m<sup>2</sup>], and obese [ $\geq 27.5$  kg/m<sup>2</sup>].<sup>6</sup>

Given the small number of individuals who were American Indian/Alaskan Native, multiracial or had missing race/ethnicity data, we collapsed them in one group in the regression models.

**eTable 5.** Distribution of Conditions Included in the Severe Maternal Morbidity by SARS-CoV-2 During Pregnancy

|                                                   | <b>Total<br/>N= 43886</b> | <b>With SARS-<br/>CoV-2<br/>N= 1325</b> | <b>Without<br/>SARS-CoV-2<br/>N= 42561</b> | <b>SMD</b> |
|---------------------------------------------------|---------------------------|-----------------------------------------|--------------------------------------------|------------|
|                                                   | n (%)                     | n (%)                                   | n (%)                                      |            |
| <b>No Severe Maternal Morbidity</b>               | 42374 (96.6)              | 1249 (94.3)                             | 41125 (96.6)                               | -0.1135    |
| <b>One diagnosis of SMM</b>                       |                           |                                         |                                            |            |
| Acute renal failure                               | 82 (0.2)                  | 0 (0)                                   | 82 (0.2)                                   | -0.0621    |
| Amniotic fluid embolism                           | 1 (0)                     | 0 (0)                                   | 1 (0)                                      | -0.0069    |
| Aneurysm                                          | 8 (0)                     | 0 (0)                                   | 8 (0)                                      | -0.0194    |
| Acute respiratory distress syndrome               | 37 (0.1)                  | 28 (2.1)                                | 9 (0)                                      | 0.2047     |
| Blood products transfusion                        | 706 (1.6)                 | 21 (1.6)                                | 685 (1.6)                                  | -0.002     |
| Cardiac arrest/ventricular fibrillation           | 1 (0)                     | 0 (0)                                   | 1 (0)                                      | -0.0069    |
| Puerperal cerebrovascular disorders               | 39 (0.1)                  | 0 (0)                                   | 39 (0.1)                                   | -0.0428    |
| Conversion of cardiac rhythm                      | 2 (0)                     | 0 (0)                                   | 2 (0)                                      | -0.0097    |
| Disseminated intravascular coagulation            | 163 (0.4)                 | 0 (0)                                   | 163 (0.4)                                  | -0.0877    |
| Eclampsia                                         | 32 (0.1)                  | 2 (0.2)                                 | 30 (0.1)                                   | 0.0242     |
| Hysterectomy                                      | 4 (0)                     | 0 (0)                                   | 4 (0)                                      | -0.0137    |
| Acute myocardial infraction                       | 1 (0)                     | 1 (0.1)                                 | 0 (0)                                      | 0.0389     |
| Pulmonary edema/acute heart failure               | 21 (0)                    | 0 (0)                                   | 21 (0.1)                                   | -0.0314    |
| Sepsis                                            | 176 (0.4)                 | 12 (0.9)                                | 164 (0.4)                                  | 0.065      |
| Shock                                             | 9 (0)                     | 0 (0)                                   | 9 (0)                                      | -0.0206    |
| Thrombotic embolism                               | 23 (0.1)                  | 0 (0)                                   | 23 (0.1)                                   | -0.0329    |
| <b>Two diagnoses of SMM on the same day</b>       | 149 (0.3)                 | 10 (0.8)                                | 139 (0.3)                                  | 0.0584     |
| <b>3-4 diagnoses of SMM on the same day</b>       | 48 (0.1)                  | 2 (0.2)                                 | 46 (0.1)                                   | 0.0119     |
| <b>5 or more diagnoses of SMM on the same day</b> | 10 (0)                    | 0 (0)                                   | 10 (0)                                     | -0.0217    |

SARS-CoV-2: severe acute respiratory syndrome coronavirus 2  
SMD: standardized mean difference

**eTable 6.** List Of Severe Maternal Morbidity Diagnoses Among Those With SARS-Cov-2 and 2 or More Severe Maternal Morbidity Diagnoses on the Same Day

| <b>Diagnosis 1</b>                  | <b>Diagnosis 2</b>                     | <b>Diagnosis 3</b>  | <b>Diagnosis 4</b>                  | <b>N (%)</b> |
|-------------------------------------|----------------------------------------|---------------------|-------------------------------------|--------------|
| Adult respiratory distress syndrome | Sepsis                                 |                     |                                     | 6 (50.0)     |
| Adult respiratory distress syndrome | Thrombotic embolism                    |                     |                                     | 1 (8.3)      |
| Adult respiratory distress syndrome | Blood products transfusion             |                     |                                     | 1 (8.3)      |
| Blood products transfusion          | Disseminated intravascular coagulation |                     |                                     | 1 (8.3)      |
| Blood products transfusion          | Hysterectomy                           |                     |                                     | 1 (8.3)      |
| Adult respiratory distress syndrome | Ventilation                            | Acute renal failure |                                     | 1 (8.3)      |
| Adult respiratory distress syndrome | Ventilation                            | Shock               | Puerperal cerebrovascular disorders | 1 (8.3)      |

**eTable 7.** Crude and Adjusted Hazard Ratio or Relative Risk Of Perinatal Complications in Association With SARS-Cov-2 Occurring at Less Than 21 Weeks' Gestation or at 21 Weeks' or More Gestation Among Individuals Who Delivered Between March 2020 and March 2021

|                                                         | With SARS-CoV-2                |                                 | Without SARS-CoV-2<br>N= 42554 | Hazard ratio (95% CI)                                       |                                                             |                                                             |                                                             |
|---------------------------------------------------------|--------------------------------|---------------------------------|--------------------------------|-------------------------------------------------------------|-------------------------------------------------------------|-------------------------------------------------------------|-------------------------------------------------------------|
|                                                         | <21 weeks' gestation<br>N= 221 | ≥21 weeks' gestation<br>N= 1111 |                                | Model 1 <sup>a</sup>                                        |                                                             | Model 2 <sup>b</sup>                                        |                                                             |
|                                                         | n (%)                          | n (%)                           | n (%)                          | With SARS-CoV-2 <21 weeks' gestation vs. Without SARS-CoV-2 | With SARS-CoV-2 ≥21 weeks' gestation vs. Without SARS-CoV-2 | With SARS-CoV-2 <21 weeks' gestation vs. Without SARS-CoV-2 | With SARS-CoV-2 ≥21 weeks' gestation vs. Without SARS-CoV-2 |
| Severe Maternal Morbidity                               | 9 (4.1)                        | 67 (6.3)                        | 1429 (3.4)                     | 1.29 (0.64, 2.61)                                           | 2.67 (2.06, 3.47)                                           | 1.36 (0.67, 2.75)                                           | 2.71 (2.08, 3.52)                                           |
| Preterm birth, <37 weeks' gestation                     | 27 (12.2)                      | 116 (10.4)                      | 3438 (8.1)                     | 1.48 (1.01, 2.19)                                           | 2.25 (1.86, 2.72)                                           | 1.55 (1.05, 2.28)                                           | 2.26 (1.87, 2.73)                                           |
| Spontaneous preterm birth, <37 weeks' gestation         | 10 (4.5)                       | 44 (4)                          | 1641 (3.9)                     | 1.16 (0.62, 2.15)                                           | 1.72 (1.26, 2.35)                                           | 1.20 (0.64, 2.23)                                           | 1.76 (1.29, 2.40)                                           |
| Medically indicated preterm birth, <37 weeks' gestation | 17 (7.7)                       | 72 (6.5)                        | 1797 (4.2)                     | 1.79 (1.09, 2.92)                                           | 2.82 (2.22, 3.58)                                           | 1.89 (1.16, 3.09)                                           | 2.80 (2.21, 3.55)                                           |
| Early preterm birth, 22-31 weeks' gestation             | 4 (1.8)                        | 11 (1)                          | 510 (1.2)                      | 1.43 (0.53, 3.85)                                           | 3.74 (2.04, 6.85)                                           | 1.39 (0.51, 3.73)                                           | 3.57 (1.95, 6.55)                                           |
| Moderate preterm birth, 32-33 weeks' gestation          | 3 (1.4)                        | 11 (1)                          | 351 (0.8)                      | 1.57 (0.50, 4.91)                                           | 2.33 (1.24, 4.38)                                           | 1.73 (0.55, 5.41)                                           | 2.36 (1.26, 4.43)                                           |
| Late preterm birth, 34-36 weeks' gestation              | 16 (7.2)                       | 93 (8.4)                        | 2473 (5.8)                     | 1.23 (0.75, 2.03)                                           | 2.12 (1.72, 2.62)                                           | 1.30 (0.79, 2.14)                                           | 2.14 (1.74, 2.64)                                           |
| Gestational hypertension                                | 7 (3.2)                        | 27 (2.4)                        | 1456 (3.4)                     | 1.65 (0.99, 2.78)                                           | 0.91 (0.67, 1.23)                                           | 1.76 (1.06, 2.92)                                           | 0.91 (0.66, 1.25)                                           |
| Pre-eclampsia/Eclampsia                                 | 3 (1.4)                        | 17 (1.5)                        | 661 (1.6)                      | 0.82 (0.26, 2.53)                                           | 1.63 (0.98, 2.69)                                           | 0.87 (0.28, 2.71)                                           | 1.62 (0.98, 2.68)                                           |
| Gestational diabetes                                    | 20 (9.1)                       | 25 (2.3)                        | 3983 (9.4)                     | 1.11 (0.72, 1.72)                                           | 1.09 (0.74, 1.62)                                           | 1.14 (0.73, 1.78)                                           | 0.99 (0.67, 1.48)                                           |
| Venous thromboembolism                                  | 2 (0.9)                        | 2 (0.2)                         | 130 (0.3)                      | 4.73 (1.12, 20.0)                                           | 2.18 (0.54, 8.79)                                           | 4.90 (1.16, 20.7)                                           | 2.24 (0.55, 9.17)                                           |
|                                                         |                                |                                 |                                | Relative Risk (95% CI)                                      |                                                             |                                                             |                                                             |
| Stillbirth                                              | 6 (2.7)                        | 3 (0.3)                         | 272 (0.6)                      | 3.89 (1.73, 8.74)                                           | 0.38 (0.12, 1.20)                                           | 3.88 (1.71, 8.80)                                           | 0.37 (0.12, 1.18)                                           |
| Cesarean delivery                                       | 53 (24)                        | 304 (27.4)                      | 11414 (26.8)                   | 0.92 (0.73, 1.15)                                           | 1.03 (0.94, 1.13)                                           | 0.93 (0.74, 1.17)                                           | 1.03 (0.94, 1.14)                                           |
| Newborn's Transient tachypnea                           | 5 (2.3)                        | 39 (3.5)                        | 1344 (3.2)                     | 0.68 (0.28, 1.62)                                           | 1.02 (0.75, 1.40)                                           | 0.69 (0.29, 1.65)                                           | 1.04 (0.76, 1.42)                                           |
| Newborn's Respiratory Support                           |                                |                                 |                                |                                                             |                                                             |                                                             |                                                             |

|                                        |           |           |            |                   |                   |                   |                   |
|----------------------------------------|-----------|-----------|------------|-------------------|-------------------|-------------------|-------------------|
| Non-Invasive                           | 15 (7)    | 67 (6.1)  | 2174 (5.1) | 1.28 (0.78, 2.09) | 1.10 (0.87, 1.39) | 1.33 (0.81, 2.17) | 1.11 (0.87, 1.40) |
| Invasive                               | 0 (0)     | 2 (0.2)   | 50 (0.1)   |                   |                   |                   |                   |
| Any of the above respiratory support   | 15 (7)    | 68 (6.1)  | 2184 (5.2) | 1.27 (0.78, 2.08) | 1.11 (0.88, 1.40) | 1.32 (0.81, 2.16) | 1.12 (0.88, 1.41) |
| Newborn's Surfactant Administration    | 1 (0.5)   | 9 (0.8)   | 248 (0.6)  | 0.71 (0.10, 5.04) | 1.20 (0.61, 2.33) | 0.66 (0.09, 4.63) | 1.13 (0.58, 2.21) |
| Apgar Score < 7                        | 1 (0.6)   | 16 (1.4)  | 497 (1.2)  | 0.42 (0.06, 2.98) | 1.14 (0.69, 1.87) | 0.45 (0.06, 3.16) | 1.17 (0.71, 1.92) |
| Small for gestational age              | 13 (6.1)  | 73 (6.6)  | 3193 (7.6) | 0.83 (0.49, 1.41) | 0.92 (0.74, 1.15) | 0.91 (0.54, 1.54) | 0.97 (0.77, 1.21) |
| Large for gestational age              | 18 (8.4)  | 97 (8.8)  | 2993 (7.1) | 1.08 (0.69, 1.69) | 1.10 (0.91, 1.33) | 1.08 (0.70, 1.69) | 1.08 (0.89, 1.31) |
| Neonatal intensive care unit admission | 24 (11.2) | 104 (9.4) | 3740 (8.9) | 1.19 (0.81, 1.73) | 0.99 (0.82, 1.19) | 1.25 (0.86, 1.81) | 1.00 (0.83, 1.20) |

Number of events reported among individuals who were SARS-CoV-2 positive are those that occurred after a SARS-CoV-2 positive test. In this group the numbers of events that occurred before a SARS-CoV-2 positive test were: 7 (0.5%) for severe maternal morbidities, 7 (0.5%) for gestational hypertension; 5 (0.4%) for pre-eclampsia/eclampsia, 83 (6.2%) for gestational diabetes, and 5 (0.4%) for venous thromboembolism.

<sup>a</sup> Model 1 adjusted for age, neighborhood deprivation index, pre-pregnancy BMI

<sup>b</sup> Model 2 adjusted for variable in Model 1 + race/ethnicity, pre-gestational diabetes, chronic hypertension and smoking during pregnancy

Severe Maternal Morbidity includes at least one of the following morbidities occurring at any time during pregnancy: acute myocardial infarction, aneurysm, acute renal failure, acute respiratory distress syndrome, amniotic fluid embolism, cardiac arrest/ventricular fibrillation, conversion of cardiac rhythm, disseminated intravascular coagulation, eclampsia, heart failure/arrest during surgery or procedure, puerperal cerebrovascular disorders, pulmonary edema/acute heart failure, severe anesthesia complications, sepsis, shock, sickle cell disease with crisis, air and thrombotic embolism, blood products transfusion, hysterectomy, temporary tracheostomy, or ventilation.<sup>5</sup>

Newborn's respiratory support was classified as: 1) non-invasive, if nasal cannula or nasal continuous positive airway pressure were used; or 2) invasive, if conventional or high-frequency mechanical ventilation were used.

**eTable 8.** Crude and Adjusted Hazard Ratio or Relative Risk of Perinatal Complications in Association With SARS-Cov-2 Detected in Inpatient or Outpatient Settings During Pregnancy Among Individuals Who Delivered Between March 2020 and March 2021

|                                                         | With SARS-CoV-2                          |                                            | Without SARS-CoV-2 | Hazard ratio (95% CI)                                                 |                                                                        |                                                                       |                                                                        |
|---------------------------------------------------------|------------------------------------------|--------------------------------------------|--------------------|-----------------------------------------------------------------------|------------------------------------------------------------------------|-----------------------------------------------------------------------|------------------------------------------------------------------------|
|                                                         | Detected in inpatient settings<br>N= 240 | Detected in outpatient settings<br>N= 1092 | N= 42554           | Model 1 <sup>a</sup>                                                  |                                                                        | Model 2 <sup>b</sup>                                                  |                                                                        |
|                                                         | n (%)                                    | n (%)                                      | n (%)              | With SARS-CoV-2 detected in inpatient settings vs. Without SARS-CoV-2 | With SARS-CoV-2 detected in outpatient settings vs. Without SARS-CoV-2 | With SARS-CoV-2 detected in inpatient settings vs. Without SARS-CoV-2 | With SARS-CoV-2 detected in outpatient settings vs. Without SARS-CoV-2 |
| Severe Maternal Morbidity                               | 11 (4.6)                                 | 65 (6)                                     | 1429 (3.4)         | 2.29 (1.16, 4.52)                                                     | 2.41 (1.86, 3.12)                                                      | 2.40 (1.21, 4.75)                                                     | 2.45 (1.89, 3.19)                                                      |
| Preterm birth, <37 weeks' gestation                     | 25 (10.4)                                | 118 (10.8)                                 | 3438 (8.1)         | 2.83 (1.85, 4.33)                                                     | 1.94 (1.60, 2.34)                                                      | 2.90 (1.90, 4.42)                                                     | 1.96 (1.63, 2.37)                                                      |
| Spontaneous preterm birth, <37 weeks' gestation         | 12 (5)                                   | 42 (3.9)                                   | 1641 (3.9)         | 2.71 (1.48, 4.96)                                                     | 1.41 (1.03, 1.93)                                                      | 2.80 (1.53, 5.13)                                                     | 1.45 (1.06, 1.98)                                                      |
| Medically indicated preterm birth, <37 weeks' gestation | 13 (5.4)                                 | 76 (7)                                     | 1797 (4.2)         | 3.01 (1.70, 5.33)                                                     | 2.47 (1.96, 3.12)                                                      | 3.11 (1.76, 5.49)                                                     | 2.49 (1.97, 3.14)                                                      |
| Early preterm birth, 22-31 weeks' gestation             | 4 (1.7)                                  | 11 (1)                                     | 510 (1.2)          | 3.86 (1.41, 10.5)                                                     | 2.33 (1.28, 4.27)                                                      | 3.80 (1.38, 10.4)                                                     | 2.24 (1.23, 4.09)                                                      |
| Moderate preterm birth, 32-33 weeks' gestation          | 1 (0.4)                                  | 13 (1.2)                                   | 351 (0.8)          | 1.22 (0.17, 8.74)                                                     | 2.23 (1.25, 3.98)                                                      | 1.32 (0.18, 9.60)                                                     | 2.30 (1.29, 4.10)                                                      |
| Late preterm birth, 34-36 weeks' gestation              | 20 (8.3)                                 | 89 (8.2)                                   | 2473 (5.8)         | 2.93 (1.83, 4.67)                                                     | 1.79 (1.44, 2.21)                                                      | 3.01 (1.89, 4.79)                                                     | 1.82 (1.47, 2.25)                                                      |
| Gestational hypertension                                | 6 (2.5)                                  | 28 (2.6)                                   | 1456 (3.4)         | 1.64 (0.81, 3.32)                                                     | 0.94 (0.70, 1.26)                                                      | 1.73 (0.87, 3.41)                                                     | 0.94 (0.69, 1.29)                                                      |
| Pre-eclampsia/Eclampsia                                 | 2 (0.8)                                  | 18 (1.7)                                   | 661 (1.6)          | 1.17 (0.29, 4.65)                                                     | 1.44 (0.89, 2.35)                                                      | 1.25 (0.31, 5.07)                                                     | 1.45 (0.89, 2.36)                                                      |
| Gestational diabetes                                    | 8 (3.3)                                  | 37 (3.4)                                   | 3983 (9.4)         | 1.16 (0.61, 2.23)                                                     | 1.09 (0.79, 1.51)                                                      | 1.25 (0.65, 2.39)                                                     | 1.02 (0.73, 1.42)                                                      |
| Venous thromboembolism                                  | 0 (0)                                    | 4 (0.4)                                    | 130 (0.3)          | 0.00 (0.00, 0.00)                                                     | 3.50 (1.25, 9.82)                                                      | 0.00 (0.00, 0.00)                                                     | 3.60 (1.27, 10.2)                                                      |
|                                                         |                                          |                                            |                    | <b>Relative Risk (95% CI)</b>                                         |                                                                        |                                                                       |                                                                        |
|                                                         |                                          |                                            |                    | Model 1                                                               | Model 2                                                                | Model 1                                                               | Model 2                                                                |
| Stillbirth                                              | 2 (0.8)                                  | 7 (0.6)                                    | 272 (0.6)          | 1.17 (0.29, 4.69)                                                     | 0.91 (0.43, 1.94)                                                      | 1.16 (0.29, 4.66)                                                     | 0.89 (0.42, 1.91)                                                      |
| Cesarean delivery                                       | 51 (21.3)                                | 306 (28)                                   | 11414 (26.8)       | 0.81 (0.63, 1.02)                                                     | 1.06 (0.96, 1.16)                                                      | 0.81 (0.64, 1.03)                                                     | 1.06 (0.96, 1.17)                                                      |
| Newborn's Transient tachypnea                           | 8 (3.4)                                  | 36 (3.3)                                   | 1344 (3.2)         | 0.97 (0.49, 1.93)                                                     | 0.96 (0.70, 1.34)                                                      | 0.99 (0.50, 1.95)                                                     | 0.98 (0.71, 1.36)                                                      |

|                                        |           |           |            |                   |                   |                   |                   |
|----------------------------------------|-----------|-----------|------------|-------------------|-------------------|-------------------|-------------------|
| Newborn's Respiratory Support          |           |           |            |                   |                   |                   |                   |
| Non-Invasive                           | 14 (5.9)  | 68 (6.3)  | 2174 (5.1) | 1.06 (0.64, 1.77) | 1.14 (0.90, 1.44) | 1.10 (0.66, 1.83) | 1.15 (0.91, 1.46) |
| Invasive                               | 1 (0.4)   | 1 (0.1)   | 50 (0.1)   | 2.95 (0.42, 20.5) | 0.66 (0.09, 4.93) | 3.02 (0.42, 21.8) | 0.60 (0.08, 4.59) |
| Any of the above respiratory support   | 14 (5.9)  | 69 (6.4)  | 2184 (5.2) | 1.06 (0.64, 1.76) | 1.15 (0.91, 1.46) | 1.09 (0.66, 1.82) | 1.16 (0.92, 1.47) |
| Newborn's Surfactant Administration    | 2 (0.8)   | 8 (0.7)   | 248 (0.6)  | 1.24 (0.31, 4.93) | 1.09 (0.54, 2.22) | 1.20 (0.30, 4.81) | 1.03 (0.50, 2.08) |
| Apgar Score < 7                        | 5 (2.1)   | 12 (1.1)  | 497 (1.2)  | 1.64 (0.68, 3.93) | 0.89 (0.50, 1.57) | 1.72 (0.71, 4.12) | 0.91 (0.52, 1.62) |
| Small for gestational age              | 16 (6.7)  | 70 (6.5)  | 3193 (7.6) | 0.93 (0.58, 1.50) | 0.90 (0.72, 1.13) | 0.99 (0.62, 1.58) | 0.95 (0.76, 1.20) |
| Large for gestational age              | 29 (12.2) | 86 (7.9)  | 2993 (7.1) | 1.55 (1.10, 2.18) | 1.00 (0.81, 1.23) | 1.54 (1.10, 2.14) | 0.99 (0.80, 1.21) |
| Neonatal intensive care unit admission | 21 (8.8)  | 107 (9.9) | 3740 (8.9) | 0.93 (0.61, 1.40) | 1.04 (0.87, 1.25) | 0.96 (0.64, 1.45) | 1.05 (0.88, 1.27) |

Number of events reported among individuals who were SARS-CoV-2 positive are those that occurred after a SARS-CoV-2 positive test. In this group the numbers of events that occurred before a SARS-CoV-2 positive test were: 7 (0.5%) for severe maternal morbidities, 7 (0.5%) for gestational hypertension; 5 (0.4%) for pre-eclampsia/eclampsia, 83 (6.2%) for gestational diabetes, and 5 (0.4%) for venous thromboembolism.

<sup>a</sup> Model 1 adjusted for age, neighborhood deprivation index, pre-pregnancy BMI

<sup>b</sup> Model 2 adjusted for variable in Model 1 + race/ethnicity, pre-gestational diabetes, chronic hypertension and smoking during pregnancy

Severe Maternal Morbidity includes at least one of the following morbidities occurring at any time during pregnancy: acute myocardial infarction, aneurysm, acute renal failure, acute respiratory distress syndrome, amniotic fluid embolism, cardiac arrest/ventricular fibrillation, conversion of cardiac rhythm, disseminated intravascular coagulation, eclampsia, heart failure/arrest during surgery or procedure, puerperal cerebrovascular disorders, pulmonary edema/acute heart failure, severe anesthesia complications, sepsis, shock, sickle cell disease with crisis, air and thrombotic embolism, blood products transfusion, hysterectomy, temporary tracheostomy, or ventilation.<sup>5</sup>

Newborn's respiratory support was classified as: 1) non-invasive, if nasal cannula or nasal continuous positive airway pressure were used; or 2) invasive, if conventional or high-frequency mechanical ventilation were used.

**eTable 9.** Adjusted Hazard Ratios for Perinatal Complications Severe Maternal Morbidity In Association With SARS-CoV-2 Among Individuals With and Without Comorbidities

|                                                         | <b>Severe Maternal Morbidity</b> | <b>Preterm birth</b> | <b>Spontaneous preterm birth</b> | <b>Medically indicated preterm birth</b> | <b>Early preterm</b> | <b>Moderate preterm birth</b> | <b>Late preterm birth</b> |
|---------------------------------------------------------|----------------------------------|----------------------|----------------------------------|------------------------------------------|----------------------|-------------------------------|---------------------------|
|                                                         | HR (95% CI)                      | HR (95% CI)          | HR (95% CI)                      | HR (95% CI)                              | HR (95% CI)          | HR (95% CI)                   | HR (95% CI)               |
| With Pre-pregnancy Obesity <sup>a</sup> (N=13261)       | 3.17 (2.22, 4.52)                | 1.93 (1.49, 2.50)    | 1.19 (0.71, 2.00)                | 2.51 (1.85, 3.41)                        | 1.72 (0.71, 4.18)    | 2.55 (1.23, 5.27)             | 1.84 (1.37, 2.48)         |
| Without Pre-pregnancy Obesity <sup>a</sup> (N=30625)    | 1.97 (1.37, 2.84)                | 2.22 (1.75, 2.82)    | 1.94 (1.37, 2.76)                | 2.61 (1.88, 3.62)                        | 3.32 (1.70, 6.46)    | 1.69 (0.65, 4.42)             | 2.07 (1.58, 2.71)         |
| P for interaction                                       | 0.14                             | 0.29                 | 0.12                             | 0.70                                     | 0.15                 | 0.46                          | 0.51                      |
| With Chronic Hypertension <sup>b</sup> (N=8598)         | 3.27 (2.06, 5.21)                | 2.41 (1.84, 3.17)    | 1.43 (0.80, 2.58)                | 3.09 (2.27, 4.21)                        | 3.24 (1.49, 7.03)    | 3.15 (1.46, 6.83)             | 2.23 (1.63, 3.04)         |
| Without Chronic Hypertension <sup>b</sup> (N=35288)     | 2.22 (1.66, 2.98)                | 1.90 (1.52, 2.37)    | 1.68 (1.22, 2.31)                | 2.19 (1.60, 2.98)                        | 2.12 (1.04, 4.31)    | 1.61 (0.71, 3.68)             | 1.82 (1.41, 2.33)         |
| P for interaction                                       | 0.39                             | 0.23                 | 0.62                             | 0.14                                     | 0.46                 | 0.27                          | 0.39                      |
| With Pre-gestational Diabetes <sup>c</sup> (N=594)      | 1.72 (0.19, 15.4)                | 3.27 (1.56, 6.86)    | 3.76 (0.39, 36.2)                | 3.56 (1.60, 7.90)                        | NA                   | 7.05 (1.00, 49.8)             | 3.36 (1.45, 7.81)         |
| Without Pre-gestational Diabetes <sup>c</sup> (N=43292) | 2.46 (1.92, 3.16)                | 2.06 (1.72, 2.45)    | 1.59 (1.20, 2.11)                | 2.55 (2.03, 3.19)                        |                      | 2.09 (1.17, 3.74)             | 1.93 (1.58, 2.35)         |
| P for interaction                                       | 0.76                             | 0.54                 | 0.70                             | 0.71                                     |                      | 0.68                          | 0.49                      |

<sup>a</sup> adjusted for age, neighborhood deprivation index, pre-gestational diabetes, chronic hypertension, smoking during pregnancy and race/ethnicity

<sup>b</sup> adjusted for age, neighborhood deprivation index, pre-pregnancy BMI, pre-gestational diabetes, smoking during pregnancy and race/ethnicity

<sup>c</sup> adjusted for age, neighborhood deprivation index, obesity, chronic hypertension, smoking during pregnancy and race/ethnicity

NA= Not applicable because there were no early preterm in the group with pre-gestational diabetes



## eReferences.

1. Van Buuren S, Oudshoorn K. *Flexible multivariate imputation by MICE*. 1999.
2. Rubin DB. Inference and Missing Data. *Biometrika*. 1976;(63):581-592. NOT IN FILE.
3. Sterne JAC, White IR, Carlin JB, et al. Multiple imputation for missing data in epidemiological and clinical research: potential and pitfalls. *BMJ*. 2009;338:b2393. doi:10.1136/bmj.b2393
4. Austin PC, White IR, Lee DS, van Buuren S. Missing Data in Clinical Research: A Tutorial on Multiple Imputation. *Can J Cardiol*. Sep 2021;37(9):1322-1331. doi:10.1016/j.cjca.2020.11.010
5. Centers for Disease Control and Prevention. How Does CDC Identify Severe Maternal Morbidity? <https://www.cdc.gov/reproductivehealth/maternalinfanthealth/smm/severe-morbidity-ICD.htm>
6. Appropriate body-mass index for Asian populations and its implications for policy and intervention strategies. *Lancet*. 2004;363(9403):157-163. NOT IN FILE.
